# Supplementary material for: Interdigitated Pt–Br chains with π-stacking: an approach toward Robin–Day class I mixed valency in MX-chain complexes
Source: Royal Society of Chemistry journal article supplement (doi:10.1039/d1dt02996g), 2021-01-01
Supplement: d1dt02996g1.pdf [file d1dt02996g1.pdf]

## Supporting Information

### Interdigitated Pt-Br chains with $\pi$ -stacking: an approach toward Robin-Day class I mixed valency in MX-chain complexes

Unjila Afrin,<sup>a</sup> Kentaro Fuku,<sup>a</sup> Mengxing Cui,<sup>a</sup> Hiroaki Iguchi,<sup>\*a</sup> Mohammad Rasel Mian,<sup>a</sup> Ryo Nakanishi,<sup>a</sup> Shinya Takaishi,<sup>a</sup> and Masahiro Yamashita<sup>\*a,b</sup>

<sup>a</sup>Department of Chemistry, Graduate School of Science, Tohoku University, 6-3 Aramaki-Aza-Aoba, Aoba-ku, Sendai, Miyagi 980-8578, Japan.

<sup>b</sup>School of Materials Science and Engineering, Nankai University, Tianjin 300350, China.

#### Table of Contents

|                                                                                          |    |
|------------------------------------------------------------------------------------------|----|
| Experimental details.....                                                                | S2 |
| Crystallographic parameters of <b>3</b> (Table S1).....                                  | S3 |
| Relationship between M–X–M distance and M <sup>II/IV</sup> –X distance (Figure S1).....  | S4 |
| Relationship between M–X–M distance and distortion parameter ( <i>d</i> ) (Figure S2)... | S5 |
| References.....                                                                          | S6 |

### **Experimental details**

**Single-crystal X-ray structure determination:** Single-crystal X-ray diffraction data of **3** were collected on a Bruker APEX-II diffractometer with a APEX II CCD detector and JAPAN thermal Engineering Co., Ltd Cryo system DX-CS190LD. The crystal structures were solved by using direct methods (SHELXT<sup>S1</sup>), followed by Fourier syntheses. Structure refinement was performed by using full matrix least-squares procedures using SHELXL<sup>S2</sup> on  $F^2$  in the Yadokari-XG2009 software.<sup>S3</sup> CCDC-2083871 contains the supplementary crystallographic data for **3**. These data can be obtained free of charge from the Cambridge Crystallographic Data Centre.

**Raman spectroscopy:** Room-temperature polarized Raman spectra were acquired on HORIBA LabRAM HR-800 with an YAG laser (532 nm), He–Ne laser (632.8 nm) and an optical microscope.

**Ultraviolet-visible absorption spectroscopy:** Ultraviolet-visible (UV-Vis) absorption spectra were performed with a JASCO V-670 instrument at room temperature. **1**, **2** and **3** was ground with KBr and compress as pellet before the measurement. The solid-state diffuse reflectance spectrum of **5** dispersed in BaSO<sub>4</sub> was already reported in the previous work.<sup>S4</sup> The obtained spectrum was transformed to the Kubelka–Munk function, which corresponds to the absorption coefficient, for comparison with the spectra of **1–3**.

**Elemental Analysis:** Elemental analysis was performed at the Research and Analytical Centre for Giant Molecules, Tohoku University.

### **Synthesis of [Pt(amp)<sub>2</sub>Br](H<sub>2</sub>PO<sub>4</sub>)<sub>2</sub>(**3**)**

[Pt(amp)<sub>2</sub>]Br<sub>2</sub> (**1**) was synthesized according to the previous report.<sup>S4</sup> Then, 11.6 mg (0.0203 mmol) of **1** was added to 1.4 mL of ethanol/water (2:5, v/v) solution, followed by adding 71 mg (0.59 mmol) of NaH<sub>2</sub>PO<sub>4</sub>. A constant current of 10  $\mu$ A was applied to the

solution via Pt electrodes. After five days, yellow crystals of **3** were obtained on the anode. (yield: 25% based on Pt). Elemental analysis, Found: C, 20.89; H, 3.02; N, 8.00. Calc. for C<sub>12</sub>H<sub>20</sub>BrN<sub>4</sub>O<sub>8</sub>P<sub>2</sub>Pt: C, 21.03; H, 2.94; N, 8.18%.

Table S1 Crystallographic parameter of **3**

|                                                     |                                                                                   |
|-----------------------------------------------------|-----------------------------------------------------------------------------------|
| Empirical formula                                   | C <sub>12</sub> H <sub>20</sub> BrN <sub>4</sub> O <sub>8</sub> P <sub>2</sub> Pt |
| Formula weight                                      | 685.26                                                                            |
| Temperature/K                                       | 296                                                                               |
| Crystal system                                      | Triclinic                                                                         |
| Space group                                         | P-1                                                                               |
| <i>a</i> /Å                                         | 6.6978(15)                                                                        |
| <i>b</i> /Å                                         | 8.6438(18)                                                                        |
| <i>c</i> /Å                                         | 8.8483(19)                                                                        |
| <i>α</i> /°                                         | 85.271(4)                                                                         |
| <i>β</i> /°                                         | 86.921(5)                                                                         |
| <i>γ</i> /°                                         | 67.163(4)                                                                         |
| Volume/Å <sup>3</sup>                               | 470.37(18)                                                                        |
| <i>Z</i>                                            | 1                                                                                 |
| $\rho_{\text{calc}}/\text{gcm}^{-3}$                | 2.419                                                                             |
| $\mu/\text{mm}^{-1}$                                | 9.803                                                                             |
| <i>F</i> (000)                                      | 327.0                                                                             |
| Crystal size/mm <sup>3</sup>                        | 0.20 × 0.17 × 0.03                                                                |
| Radiation                                           | MoK $\alpha$ ( $\lambda = 0.71073$ )                                              |
| 2 $\theta$ range for data collection/°              | 6.602 to 69.764                                                                   |
| Reflections collected                               | 3655                                                                              |
| Independent reflections                             | 3655 [ <i>R</i> <sub>int</sub> = 0.0158, <i>R</i> <sub>sigma</sub> = 0.0392]      |
| Data/restraints/parameters                          | 3655/0/133                                                                        |
| Goodness-of-fit on <i>F</i> <sup>2</sup>            | 1.034                                                                             |
| Final <i>R</i> indexes [ <i>I</i> ≥ 2σ( <i>I</i> )] | <i>R</i> <sub>1</sub> = 0.0247, <i>wR</i> <sub>2</sub> = 0.0564                   |
| Final <i>R</i> indexes [all data]                   | <i>R</i> <sub>1</sub> = 0.0254, <i>wR</i> <sub>2</sub> = 0.0567                   |
| Largest diff. peak/hole / e Å <sup>-3</sup>         | 1.44/-1.99                                                                        |

**Relationship between M–X–M distance and M<sup>III/IV</sup>–X distance**

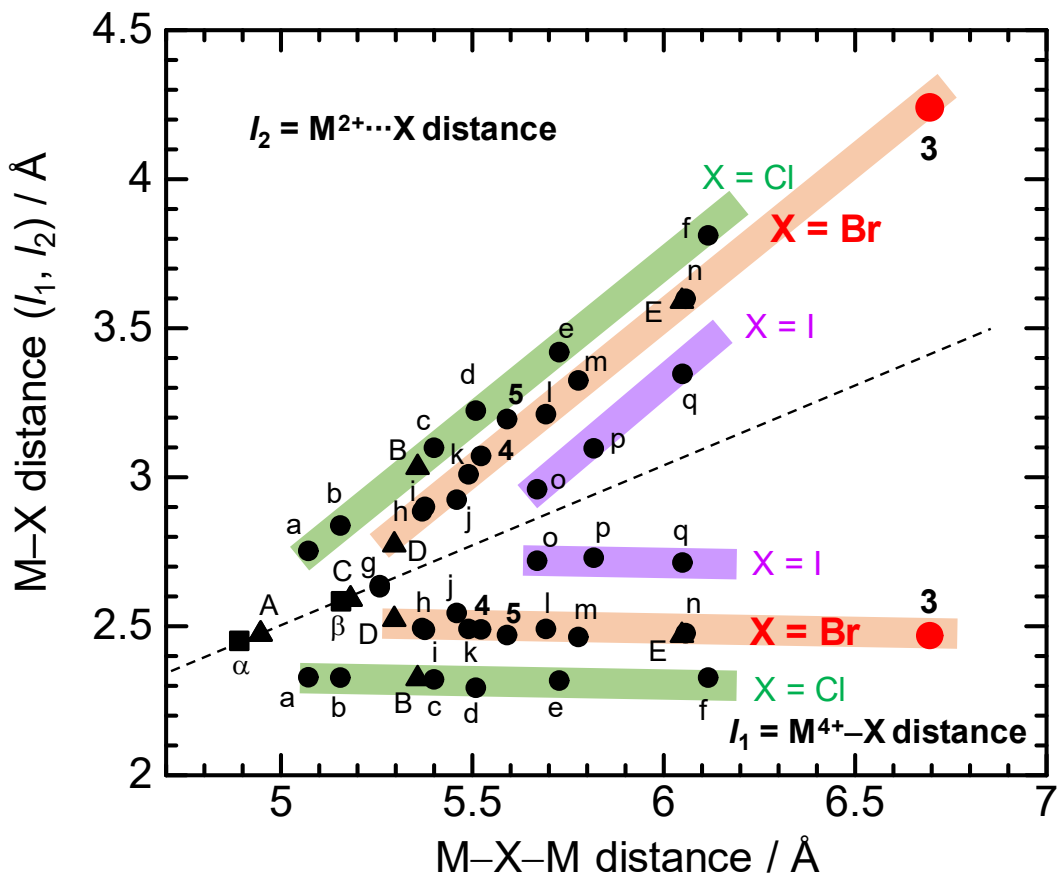

Figure S1. Correlation between M–X–M distance and  $l_1, l_2$ , where  $l_1$  is  $M^{4+}$ –X distance and  $l_2$  is  $M^{2+}$ –X distance. Square, triangle and circle represent Ni, Pd and Pt-based MX chains, respectively. Red circle represents the target complex **3**. Other data are shown for [Ni(chxn)<sub>2</sub>Cl]Cl<sub>2</sub>( $\alpha$ ),<sup>S5</sup> [Ni(chxn)<sub>2</sub>Br]Br<sub>2</sub>( $\beta$ ),<sup>S5</sup> [Pd(dabdoH)<sub>2</sub>Cl]Cl<sub>2</sub>(A),<sup>S6</sup> [Pd(en)<sub>2</sub>Cl](ClO<sub>4</sub>)<sub>2</sub>(B),<sup>S5</sup> [Pd(dabdoH)<sub>2</sub>Br]Br<sub>2</sub>(C),<sup>S7</sup> [Pd(chxn)<sub>2</sub>Br]Br<sub>2</sub>(D),<sup>S5</sup> [Pd(en)<sub>2</sub>Br](ReO<sub>4</sub>)<sub>4</sub>(E),<sup>S8</sup> [Pt(dabdoH)<sub>2</sub>Cl]Cl<sub>2</sub>(a),<sup>S9</sup> [Pt(chxn)<sub>2</sub>Cl]Cl<sub>2</sub>(b),<sup>S5</sup> [Pt(en)<sub>2</sub>Cl](ClO<sub>4</sub>)<sub>2</sub>(c),<sup>S5</sup> [Pt(pn)<sub>2</sub>Cl](ClO<sub>4</sub>)<sub>2</sub>(d),<sup>S10</sup> [Pt(chxn)<sub>2</sub>Cl](ClO<sub>4</sub>)<sub>2</sub>(e),<sup>S5</sup> [Pt(en)<sub>2</sub>Cl](ReO<sub>4</sub>)<sub>2</sub>(f),<sup>S8</sup> [Pt(dabdoH)<sub>2</sub>Br]Br<sub>2</sub>(g),<sup>S9</sup> [Pt(chxn)<sub>2</sub>Br]Br<sub>2</sub>(h),<sup>S5</sup> [Pt(en)<sub>2</sub>Br](C<sub>6</sub>-Y)<sub>4</sub>.H<sub>2</sub>O(i),<sup>S11</sup> [Pt(tn)<sub>2</sub>Br](BF<sub>4</sub>)<sub>2</sub>(j),<sup>S10</sup> [Pt(en)<sub>2</sub>Br](ClO<sub>4</sub>)<sub>4</sub>(polymorph I)(k),<sup>S5</sup> [Pt(en)<sub>2</sub>Br](ClO<sub>4</sub>)<sub>4</sub>(polymorph II)(l),<sup>S5</sup> [Pt(chxn)<sub>2</sub>Br](ClO<sub>4</sub>)<sub>2</sub>(m),<sup>S5</sup> [Pt(en)<sub>2</sub>Br](ReO<sub>4</sub>)<sub>4</sub>(n),<sup>S8</sup> [Pt(chxn)<sub>2</sub>I]I<sub>2</sub>(o),<sup>S5</sup> [Pt(en)<sub>2</sub>I](ClO<sub>4</sub>)<sub>2</sub>(p),<sup>S5</sup> [Pt(en)<sub>2</sub>I](ReO<sub>4</sub>)<sub>2</sub>(q),<sup>S8</sup> **4** and **5**. Green, orange and purple highlight lines are guides for the eyes for each X<sup>-</sup> ion. (chxn = cyclohexanediamine; en = ethylenediamine; tn = 1,3-diaminopropane, pn = 1,2-diaminopropane, dabdoH = (2*S*,3*S*)-2,3-diaminobutane-1,4-diol.)

Relationship between M–X–M distance and distortion parameter ( $d$ )

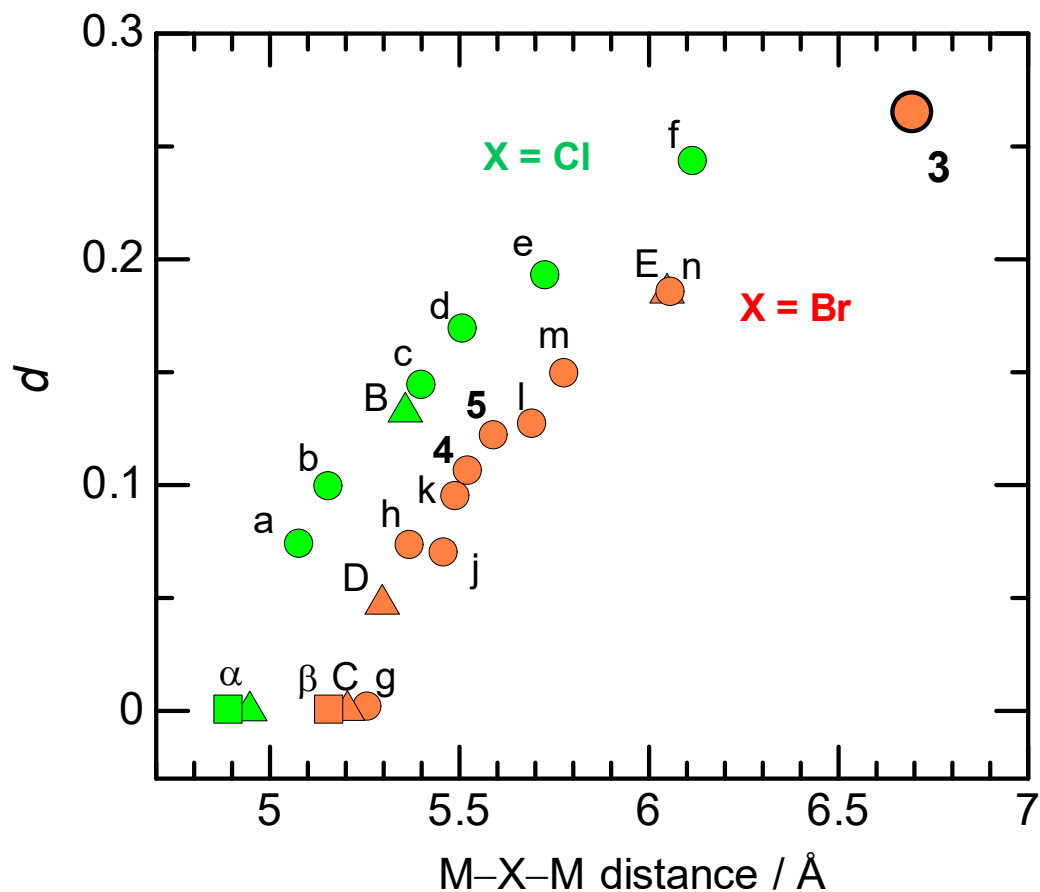

Figure S2. Correlation between M–X–M distance and distortion parameter  $d$ , which is defined as  $d = (l_2 - l_1)/(\text{Pt–Br–Pt distance})$ . Square, triangle and circle represent Ni, Pd and Pt-based MX chains, respectively. Green and orange colour represents Cl<sup>-</sup> and Br<sup>-</sup> bridged chains, respectively. The labels are corresponding to those defined in Figure S1.

## **References:**

- (S1) G. M. Sheldrick, *Acta Crystallogr., Sect. A: Found. Adv.*, 2015, **A71**, 3.
- (S2) G. M. Sheldrick, *Acta Crystallogr., Sect. C: Struct. Chem.*, 2015, **C71**, 3.
- (S3) K. Wakita, Yadokari-XG, Software for Crystal Structure Analyses, 2001; Release of Software (Yadokari-XG 2009) for Crystal Structure Analyses; C. Kabuto, S. Akine, T. Nemoto and E. Kwon, *J. Crystallogr. Soc. Jpn.*, 2009, **51**, 218.
- (S4) U. Afrin, H. Iguchi, M. R. Mian, S. Takaishi, H. Yamakawa, T. Terashige, T. Miyamoto, H. Okamoto and M. Yamashita, *Dalton Trans.*, 2019, **48**, 7828.
- (S5) H. Okamoto, M. Yamashita, *Bull. Chem. Soc. Jpn.*, 1998, **71**, 2023.
- (S6) M. R. Mian, M. Wakizaka, T. Yoshida, H. Iguchi, S. Takaishi, U. Afrin, T. Miyamoto, H. Okamoto, H. Tanaka, S. Kuroda, B. K. Breedlove and M. Yamashita, *Dalton Trans.*, 2021, **50**, 1614.
- (S7) M. R. Mian, H. Iguchi, S. Takaishi, H. Murasugi, T. Miyamoto, H. Okamoto, H. Tanaka, S. Kuroda, B. K. Breedlove and M. Yamashita, *J. Am. Chem. Soc.*, 2017, **139**, 6562.
- (S8) S. Kumagai, S. Takaishi, M. Gao, H. Iguchi, B. K. Breedlove and M. Yamashita, *Inorg. Chem.*, 2018, **57**, 3775.
- (S9) M. R. Mian, H. Iguchi, S. Takaishi, U. Afrin, T. Miyamoto, H. Okamoto and M. Yamashita, *Inorg. Chem.*, 2019, **58**, 114.
- (S10) R. J. H. Clark, in *Advances in Infrared and Raman Spectroscopy Volume 11*, ed. R. J. H. Clark and R. E. Hester, Wiley, Hayden, 1984, Chapter 3.
- (S11) S. Kumagai, H. Iguchi, S. Takaishi, B. K. Breedlove, M. Yamashita, H. Matsuzaki, H. Okamoto, K. Kato and M. Takata, *Inorg. Chem.*, 2014, **53**, 11764.
